# Supplementary material for: Chemoselective oxidation of primary alcohols catalysed by Ce(iii)-complex intercalated LDH using molecular oxygen at room temperature
Source: Royal Society of Chemistry journal article supplement (doi:10.1039/c1dt11140j), 2011-01-01
Supplement: c1dt11140j.pdf [file c1dt11140j.pdf]

## Supporting informations:

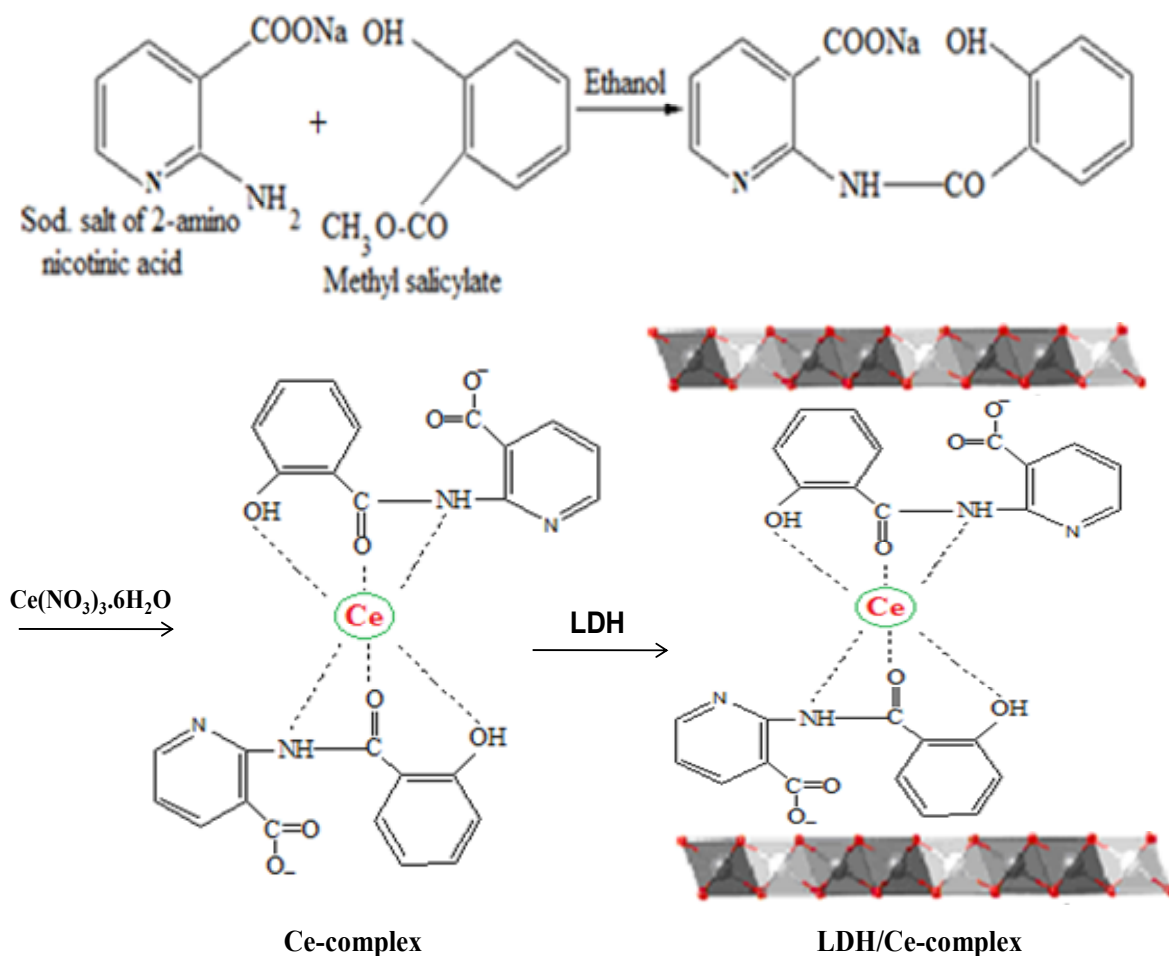

**Scheme S1** Synthesis pathway for the formation of Ce-complex intercalated LDH

## Possible mechanistic pathway

Scheme S2 represents the possible mechanistic pathway for alcohol oxidation (ex- benzyl alcohol). Reaction proceeds with oxidative addition of mol. $\text{O}_2$  to Ce-centre to form an oxo bridge complex which is unstable followed by addition of benzyl alcohol. Subsequent step involves the reductive elimination to form benzaldehyde.

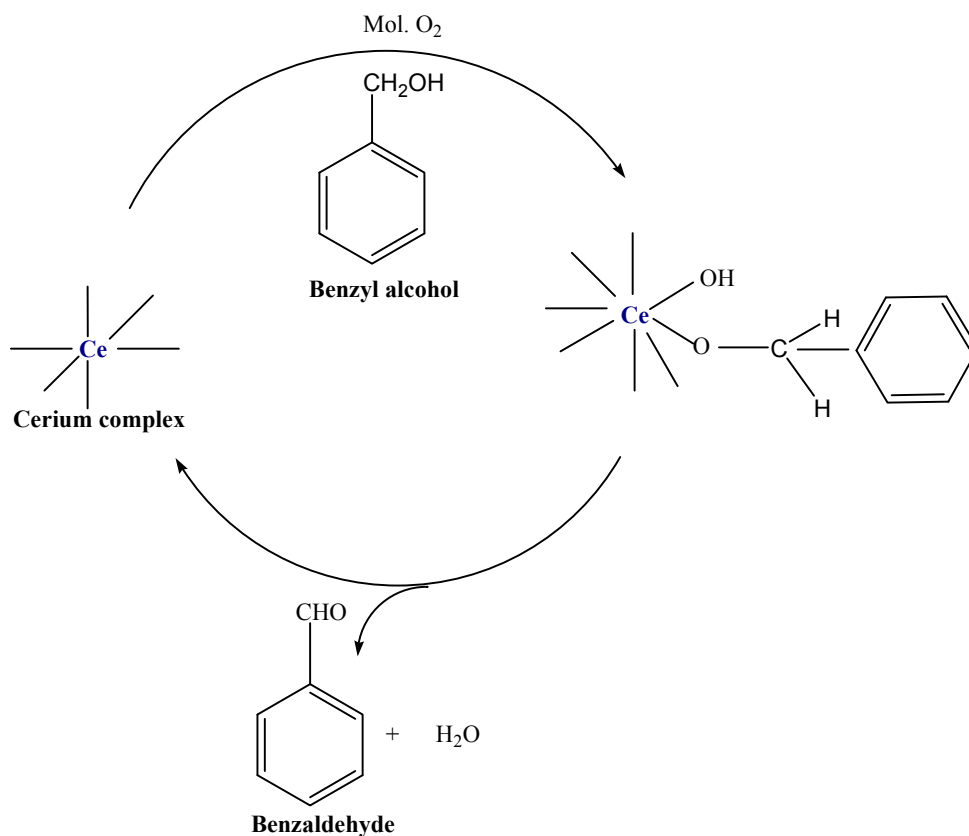

**Scheme S2** Plausible mechanistic pathway for benzyl alcohol oxidation

### Scanning electron microscope studies

Figure S1 shows scanning electron micrographs of each of the catalysts prior to reaction. The unmodified LDH in Figure S1(a) has a conventional large-hexagonal plate like morphology with sharp edges. But in case of complex intercalated LDH, a slight defective image indicating flexibility of the host layer and intercalation of complex in the ion exchange process.

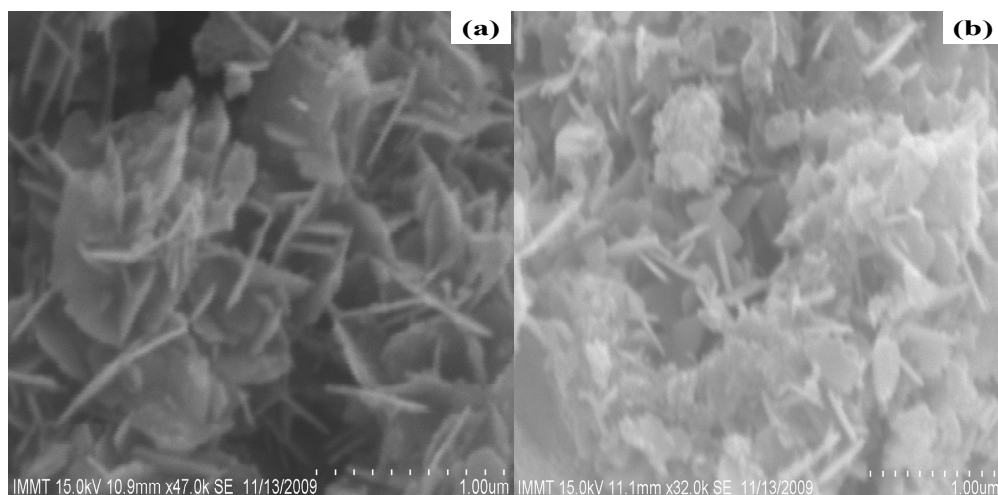

**Fig. S1** SEM images of (a) Zn/Al-LDH (b) LDH/Ce-complex

### Thermogravimetric analysis

Figure S2 shows the TGA curves of Zn/Al-NO<sub>3</sub> (solid line) and LDH/Ce-complex (dotted line). Generally, four steps are observed in the thermal evolution of LDH.<sup>1</sup> Desorption of physically adsorbed water, removal of interlayer structural water, dehydroxylation of the brucite-like sheets, and decomposition of the interlayer anions. The first weight loss for Zn/Al-NO<sub>3</sub> occurs from room temperature to 125 °C which is due to the removal of crystallization water (7%). A mass loss of 28.4% takes place in the temperature range 200-500 °C, attributed to decomposition of the brucite-like layer and removal of interlayer anions. A second step is observed from 175 to 230 °C, assigned to partial dehydroxylation of the double hydroxide layers. Complete dehydroxylation of the lattice takes place from 390 to 590 °C, accompanied by elimination/decomposition of the organic anion.

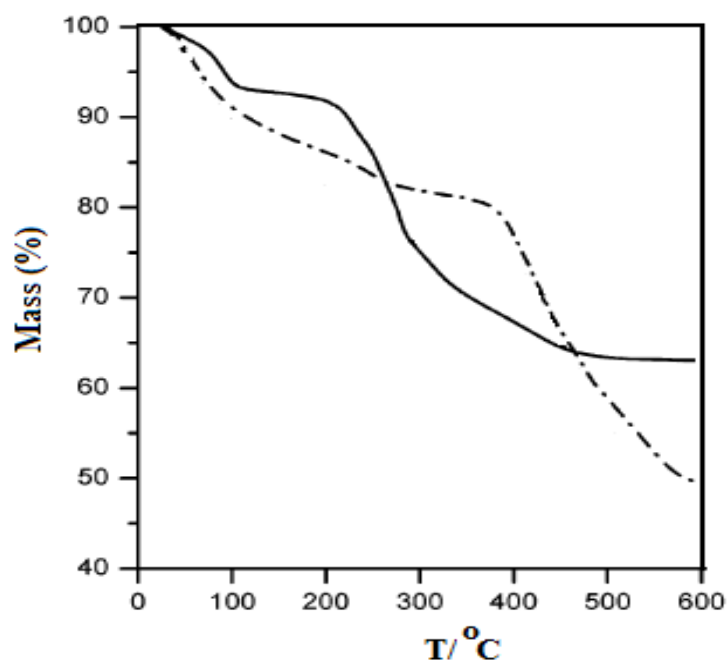

TGA curves of Zn/Al LDH (—) and LDH/Ce complex (· - - ·)

**Fig. S2** TGA curves of Zn/Al-LDH (—) and LDH/Ce complex (· - - ·)

### <sup>13</sup>C CP MAS NMR spectra

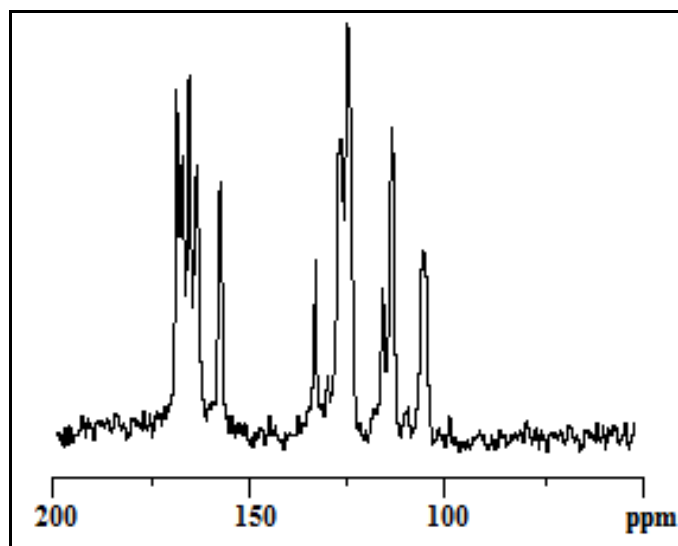

**Fig. S3** <sup>13</sup>C CP MAS NMR spectra of Ce-complex

## References

- 1 V. Rives, Layered Double Hydroxides: Present and Future; *Nova Science Publishers*: New York, 2001.
